# Supplementary material for: Selective oxidation of 1,2-propanediol to lactic acid over Cu-modified Au/hydrotalcite catalysts
Source: Royal Society of Chemistry journal article supplement (doi:10.1039/d0nj02526g), 2020-01-01
Supplement: d0nj02526g1.pdf [file d0nj02526g1.pdf]

Electronic Supplementary Information (ESI) for:

## **Selective oxidation of 1,2-propanediol to lactic acid over Cu modified**

### **Au/hydrotalcite catalysts**

Junying Tian,<sup>a</sup> Hailong Liu,<sup>a</sup> Ping Li,<sup>b</sup> Zhiwei Huang,<sup>a</sup> Jing Chen<sup>\*a</sup>

*a: State Key Laboratory for Oxo Synthesis and Selective Oxidation, Lanzhou Institute of Chemical Physics (LICP), Chinese Academy of Sciences, Lanzhou 730000, China. Email: [chenj@licp.cas.cn](mailto:chenj@licp.cas.cn)*

*b: College of Science, Gansu Agricultural University, Lanzhou 730070, China.*

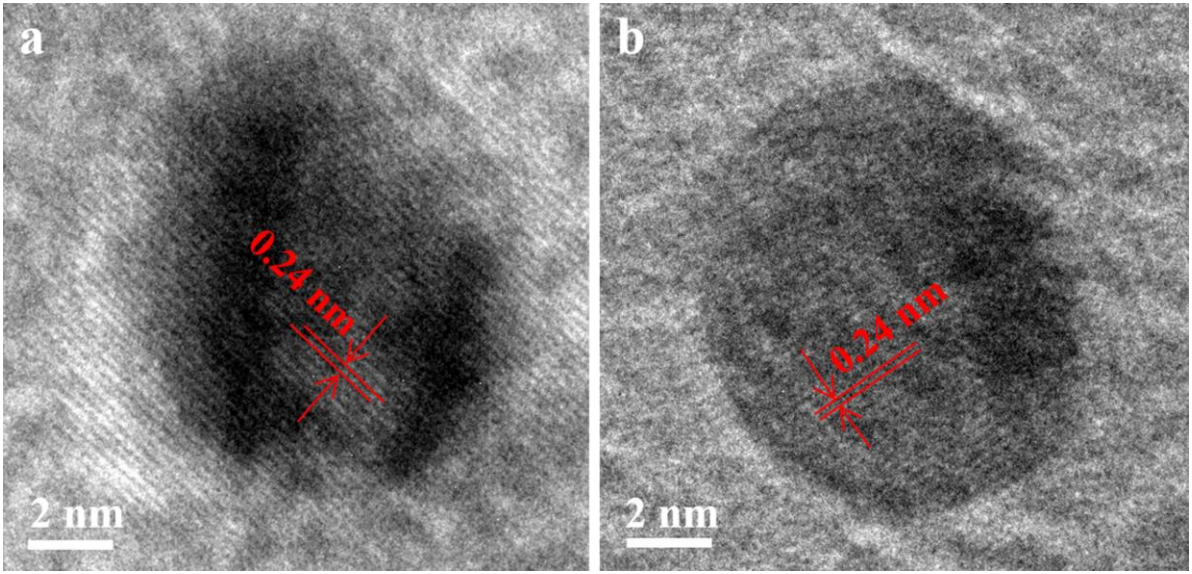

**Fig. S1 HRTEM of Au/HT and 0.5Cu-Au/HT**
